# Supplementary material for: Conservation and Management of Protected Areas in China and India: A Literature Review (1990–2021)
Source: MDPI journal article supplement (doi:10.3390/cli11010022), 2023-01-12
Supplement: s1 [file s1]

**Table S1.** Annual number and citation of CPAP-related publications from 1990 to 2021

| Year | TP         | TC         | AC           | ≥100 | ≥50      | ≥30      | ≥10       | ≥1        | %TP           | H-index   |
|------|------------|------------|--------------|------|----------|----------|-----------|-----------|---------------|-----------|
| 1990 | 0          | 0          | 0            | 0    | 0        | 0        | 0         | 0         | 0.000         | 0         |
| 1991 | 1          | 0          | 0.00         | 0    | 0        | 0        | 0         | 0         | 0.079         | 0         |
| 1992 | 1          | 0          | 0.00         | 0    | 0        | 0        | 0         | 0         | 0.079         | 0         |
| 1993 | 1          | 95         | <b>95.00</b> | 0    | 1        | 1        | 1         | 1         | 0.079         | 1         |
| 1994 | 1          | 29         | 29.00        | 0    | 0        | 0        | 1         | 1         | 0.079         | 1         |
| 1995 | 3          | 5          | 1.67         | 0    | 0        | 0        | 0         | 1         | 0.238         | 1         |
| 1996 | 0          | 0          | 0.00         | 0    | 0        | 0        | 0         | 0         | 0.000         | 0         |
| 1997 | 3          | 0          | 0.00         | 0    | 0        | 0        | 0         | 0         | 0.238         | 0         |
| 1998 | 2          | 0          | 0.00         | 0    | 0        | 0        | 0         | 0         | 0.159         | 0         |
| 1999 | 4          | 27         | 6.75         | 0    | 0        | 0        | 0         | 0         | 0.317         | 1         |
| 2000 | 2          | 0          | 0.00         | 0    | 0        | 0        | 0         | 0         | 0.159         | 0         |
| 2001 | 2          | 0          | 0.00         | 0    | 0        | 0        | 0         | 0         | 0.159         | 0         |
| 2002 | 12         | 162        | 13.50        | 0    | 1        | 3        | 4         | 4         | 0.952         | 4         |
| 2003 | 6          | 0          | 0.00         | 0    | 0        | 0        | 0         | 0         | 0.476         | 0         |
| 2004 | 10         | 293        | 29.30        | 1    | 2        | 2        | 2         | 2         | 0.794         | 2         |
| 2005 | 11         | 100        | 9.09         | 1    | 1        | 1        | 1         | 1         | 0.873         | 1         |
| 2006 | 24         | 77         | 3.21         | 0    | 0        | 0        | 4         | 4         | 1.905         | 4         |
| 2007 | 21         | 381        | 18.14        | 1    | <b>4</b> | 4        | 4         | 5         | 1.667         | 4         |
| 2008 | 13         | <b>800</b> | <b>61.54</b> | 1    | 1        | 1        | 1         | 1         | 1.032         | 1         |
| 2009 | 37         | 75         | 2.03         | 0    | 1        | 1        | 2         | 2         | 2.937         | 2         |
| 2010 | 38         | 102        | 2.68         | 0    | 0        | 0        | 4         | 6         | 3.016         | 5         |
| 2011 | 47         | 293        | 6.23         | 0    | 2        | 4        | 8         | 10        | 3.730         | 8         |
| 2012 | 52         | 238        | 4.58         | 0    | 1        | 3        | 8         | 9         | 4.127         | 8         |
| 2013 | 45         | 239        | 5.31         | 0    | 0        | <b>5</b> | 6         | 10        | 3.571         | 6         |
| 2014 | 60         | 213        | 3.55         | 1    | 1        | 1        | 5         | 9         | 4.762         | 7         |
| 2015 | 57         | 99         | 1.74         | 0    | 0        | 1        | 3         | 8         | 4.524         | 6         |
| 2016 | 88         | 489        | 5.56         | 1    | <b>4</b> | 4        | 13        | 18        | 6.984         | 12        |
| 2017 | 85         | 180        | 2.12         | 0    | 0        | 1        | 7         | 12        | 6.746         | 8         |
| 2018 | 117        | 453        | 3.87         | 0    | 0        | <b>5</b> | <b>19</b> | 29        | 9.286         | <b>14</b> |
| 2019 | 133        | 210        | 1.58         | 0    | 0        | 2        | 9         | 17        | 10.556        | 9         |
| 2020 | 183        | 242        | 1.32         | 0    | 0        | 1        | 7         | <b>33</b> | 14.524        | 9         |
| 2021 | <b>201</b> | 60         | 0.30         | 0    | 0        | 0        | 2         | 17        | <b>15.952</b> | 4         |

NP- total number of publications; TC- total number of citations; AC- average number of citations per article; ≥ 100, ≥50, ≥30, ≥10, ≥1-the number of citations is greater than or equal to 100, 50, 30, 10, 1 respectively. Each indicator's maximum value is marked in bold.

**Table S2.** Annual number and citation of IPAP-related publications from 1990 to 2021

| Year | TP         | TC          | AC           | ≥300 | ≥200 | ≥100     | ≥50       | ≥1         | %TP           | H-index   |
|------|------------|-------------|--------------|------|------|----------|-----------|------------|---------------|-----------|
| 1990 | 3          | 48          | 16.00        | 0    | 0    | 0        | 0         | 2          | 0.231         | 1         |
| 1991 | 7          | 204         | 29.14        | 0    | 0    | 0        | 2         | 6          | 0.539         | 4         |
| 1992 | 10         | 133         | 13.30        | 0    | 0    | 0        | 0         | 7          | 0.770         | 5         |
| 1993 | 6          | 52          | 8.67         | 0    | 0    | 0        | 0         | 5          | 0.462         | 4         |
| 1994 | 7          | 66          | 9.43         | 0    | 0    | 0        | 0         | 4          | 0.539         | 3         |
| 1995 | 11         | 164         | 14.91        | 0    | 0    | 0        | 2         | 10         | 0.847         | 5         |
| 1996 | 18         | 578         | 32.11        | 0    | 0    | 2        | 4         | 14         | 1.387         | 8         |
| 1997 | 13         | 374         | 28.77        | 0    | 0    | 2        | 2         | 13         | 1.002         | 8         |
| 1998 | 17         | 714         | 42.00        | 0    | 0    | 3        | 5         | 16         | 1.310         | 11        |
| 1999 | 4          | 31          | 7.75         | 0    | 0    | 0        | 0         | 3          | 0.308         | 2         |
| 2000 | 16         | 587         | 36.69        | 0    | 0    | 2        | 3         | 12         | 1.233         | 10        |
| 2001 | 13         | 546         | 42.00        | 0    | 0    | 1        | 4         | 13         | 1.002         | 9         |
| 2002 | 7          | 400         | <b>57.14</b> | 0    | 0    | 1        | 3         | 7          | 0.539         | 7         |
| 2003 | 12         | 601         | 50.08        | 0    | 0    | 2        | 2         | 11         | 0.924         | 10        |
| 2004 | 24         | 1028        | 42.83        | 0    | 0    | 3        | 8         | 23         | 1.849         | 16        |
| 2005 | 19         | 671         | 35.32        | 0    | 1    | 2        | 4         | 17         | 1.464         | 11        |
| 2006 | 33         | 1713        | 51.91        | 0    | 2    | <b>5</b> | <b>10</b> | 29         | 2.542         | 18        |
| 2007 | 36         | 1725        | 47.92        | 1    | 2    | 4        | 8         | 33         | 2.773         | 19        |
| 2008 | 41         | 1629        | 39.73        | 1    | 2    | 4        | 5         | 38         | 3.159         | 19        |
| 2009 | 54         | <b>1780</b> | 32.96        | 0    | 1    | 5        | 7         | 52         | 4.160         | <b>23</b> |
| 2010 | 54         | 1433        | 26.54        | 0    | 0    | 2        | 9         | 49         | 4.160         | <b>23</b> |
| 2011 | 58         | 1535        | 26.47        | 0    | 1    | 3        | 6         | 54         | 4.468         | 19        |
| 2012 | 44         | 1332        | 30.27        | 0    | 0    | 2        | 9         | 43         | 3.390         | 21        |
| 2013 | 57         | 1615        | 28.33        | 0    | 2    | 2        | 8         | 52         | 4.391         | 20        |
| 2014 | 62         | 1056        | 17.03        | 0    | 0    | 0        | 5         | 59         | 4.777         | 18        |
| 2015 | 69         | 1146        | 16.61        | 0    | 0    | 0        | 3         | 67         | 5.316         | 20        |
| 2016 | 83         | 1146        | 13.81        | 0    | 0    | 0        | 4         | 80         | 6.394         | 18        |
| 2017 | 76         | 821         | 10.80        | 0    | 0    | 0        | 1         | 70         | 5.855         | 17        |
| 2018 | 77         | 1253        | 16.27        | 1    | 0    | 0        | 3         | 72         | 5.932         | 17        |
| 2019 | 95         | 572         | 6.02         | 0    | 0    | 0        | 1         | 82         | 7.319         | 11        |
| 2020 | <b>138</b> | 691         | 5.01         | 0    | 0    | 0        | 0         | <b>108</b> | <b>10.632</b> | 12        |
| 2021 | 134        | 264         | 1.97         | 0    | 0    | 0        | 0         | 70         | 10.324        | 7         |

≥ 300, ≥200, ≥100, ≥50, ≥1- the number of citations is greater than or equal to 300, 200, 100, 50, 1 respectively.
